# Supplementary material
Source: publisher figshare collection journal article supplement (https://gsajournals.figshare.com/ndownloader/files/27627812)
Supplement: Supplementary file 1 [file 27627812]

## Sheet: Sheet1
Table S6. H3K9me2 at junction p-values
RCE	clr4∆ 1Rdg	1Ldg	1Rdg	2Ldg	3Ldg	3Rdg	1Rdh	2LRdh	3LRdh	3Ldh	3Rdh
clr4∆ 1Rdg	-
1Ldg	0.0038	-
1Rdg	0.0124	ns	-
2Ldg	0.0021	ns	ns	-
3Ldg	<0.0001	ns	0.0191	0.0193	-
3Rdg	<0.0001	ns	ns	ns	0.0008	-
1Rdh	0.0236	ns	ns	ns	0.0385	ns	-
2LRdh	0.0185	ns	ns	ns	ns	ns	ns	-
3LRdh	0.0453	ns	ns	ns	ns	ns	ns	ns	-
3Ldh	0.0369	ns	ns	ns	ns	ns	ns	ns	ns	-
3Rdh	0.0014	ns	ns	ns	0.002	ns	ns	ns	ns	ns	-
